# Supplementary material for: A New Interactive Web-Based Polytomous Key for Species Identification of Pin Nematodes of the Genus Paratylenchus Micoletzky, 1922 (Nematoda: Paratylenchinae) with the Use of Ribosomal and Mitochondrial Genes
Source: Hindawi journal article supplement (doi:10.1155/2022/6216266), 2022-07-04
Supplement: f1 [file 6216266.f1.pdf]

**Table S1.** Updated checklist of valid species of the genus *Paratylenchus* Micoletzky, 1922.

|     | <i>Paratylenchus</i> species                                            |
|-----|-------------------------------------------------------------------------|
| 1.  | <i>P. abietis</i> Eroshenko, 1974                                       |
| 2.  | <i>P. aciculus</i> Brown, 1959                                          |
| 3.  | <i>P. acti</i> Eroshenko, 1978                                          |
| 4.  | <i>P. aculentus</i> Brown, 1959                                         |
| 5.  | <i>P. alleni</i> Raski, 1975                                            |
| 6.  | <i>P. amundseni</i> Bernard, 1982                                       |
| 7.  | <i>P. anceps</i> Cobb, 1923                                             |
| 8.  | <i>P. anchorus</i> (Mohilal & Dhanachand, 2004) Ghaderi et al., 2014    |
| 9.  | <i>P. aonli</i> Misra & Edward, 1971                                    |
| 10. | <i>P. aquaticus</i> Merny, 1966                                         |
| 11. | <i>P. arculatus</i> Luc & de Guiran, 1962                               |
| 12. | <i>P. audriellus</i> Brown, 1959                                        |
| 13. | <i>P. baldaccii</i> Raski, 1975                                         |
| 14. | <i>P. beltsvillensis</i> Kantor et al., 2021                            |
| 15. | <i>P. bilineatus</i> (Brzeski, 1995) Brzeski, 1998                      |
| 16. | <i>P. brasiliensis</i> (Huang & Raski, 1986) Brzeski, 1998              |
| 17. | <i>P. breviculus</i> Raski, 1975                                        |
| 18. | <i>P. brevihastatus</i> Wu, 1962                                        |
| 19. | <i>P. bukowinensis</i> Micoletzky, 1922                                 |
| 20. | <i>P. canchicus</i> Mohilal & Dhanachand, 2004                          |
| 21. | <i>P. capitatus</i> (Adams & Eichenmuller, 1962) Siddiqi & Goodey, 1964 |
| 22. | <i>P. caravaquenus</i> Clavero-Camacho et al., 2021                     |
| 23. | <i>P. chongqingensis</i> Li, Wang, Xie & Xu, 2019                       |
| 24. | <i>P. ciccaronei</i> Raski, 1975                                        |
| 25. | <i>P. colbrani</i> Raski, 1975                                          |
| 26. | <i>P. colinus</i> (Huang & Raski, 1986) Brzeski, 1998                   |
| 27. | <i>P. concavus</i> Eroshenko, 1978                                      |
| 28. | <i>P. conicephalus</i> Van den Berg, Eskandari, Teidt & Karegar, 2011   |
| 29. | <i>P. corbetti</i> (Ganguly & Khan, 1990) Siddiqi, 2000                 |
| 30. | <i>P. coronatus</i> Colbran, 1965                                       |
| 31. | <i>P. costatus</i> (Raski, 1976) Siddiqi, 1986                          |
| 32. | <i>P. crenatus</i> Corbett, 1966                                        |
| 33. | <i>P. dianthus</i> Jenkins & Taylor, 1956                               |
| 34. | <i>P. discocephalus</i> Siddiqi, Khan & Ganguly, 1990                   |
| 35. | <i>P. elachistus</i> Steiner, 1949                                      |
| 36. | <i>P. elegans</i> (Raski, 1962) Siddiqi & Goodey, 1964                  |
| 37. | <i>P. elongatus</i> (Abdel-Rahman & Maggenti, 1988) Brzeski, 1998       |
| 38. | <i>P. emmoti</i> Dolinski, Souza & Huang, 1996                          |
| 39. | <i>P. enatus</i> (Raski, 1976) Siddiqi, 1986                            |
| 40. | <i>P. enigmaticus</i> Munawar et al., 2021                              |
| 41. | <i>P. epacris</i> (Allen & Jensen, 1950) Goodey, 1963                   |

42. *P. epicotylus* Siddiqi, Khan & Ganguly, 1990
43. *P. flectospiculus* Huang & Raski, 1987
44. *P. fueguensis* Raski & Valenzuela, 1986
45. *P. goldeni* Raski, 1975
46. *P. goodeyi* Oostenbrink, 1953
47. *P. guangzhouensis* Wang, Li, Xie, Yu & Wu, 2016
48. *P. halophilus* Wouts, 1966
49. *P. hamatus* Thorne & Allen, 1950
50. *P. hamicaudatus* (Cid del Prado Vera & Maggenti, 1988) Brzeski, 1998
51. *P. holdemani* Raski, 1975
52. *P. humilis* Raski, 1975
53. *P. idalimus* (Raski, 1962) Siddiqi & Goodey, 1964
54. *P. indalus* Clavero-Camacho et al., 2021
55. *P. intermedius* (Raski, 1962) Siddiqi & Goodey, 1964
56. *P. israelensis* (Raski, 1973) Siddiqi, 1986
57. *P. italiensis* Raski, 1975
58. *P. ivorensis* Luc & de Guiran, 1962
59. *P. janai* (Baqri, 1979) Siddiqi, 1986
60. *P. jasminae* Phani, Somanwashi, Rao & Khan, 2019
61. *P. juglansi* Kaul & Waliullah, 1990
62. *P. labiosus* Anderson & Kimpinski, 1977
63. *P. laocaiensis* Nguyen, Baldwin & Choi, 2004
64. *P. latescens* (Raski, 1976) Siddiqi, 1986
65. *P. leiodermis* Raski, 1975
66. *P. lepidus* Raski, 1975
67. *P. leptos* Raski, 1975
68. *P. longicaudatus* Raski, 1975
69. *P. longilabiatus* (Huang & Raski, 1986) Brzeski, 1998
70. *P. macrodorus* Brzeski, 1963
71. *P. marylandicus* Jenkins, 1960
72. *P. mexicanus* Raski, 1975
73. *P. micoletzkyi* Edward, Misra & Singh, 1967
74. *P. microdorus* Andrásy, 1959
75. *P. mimulus* Raski, 1975
76. *P. minor* Sharma, Sharma & Khan, 1986
77. *P. minusculus* Tarjan, 1960
78. *P. minutus* Linford in Linford, Oliveira & Ishii, 1949
79. *P. mirus* (Raski, 1962) Siddiqi & Goodey, 1964
80. *P. morius* Yokoo, 1970
81. *P. musae* (Shahina & Maqbool, 1993) Brzeski, 1998
82. *P. mutabilis* Colbran, 1969
83. *P. nainianus* Edward & Misra, 1963
84. *P. nanjingensis* Wang, Xie, Li, Wu & Xu, 2016
85. *P. nanus* Cobb, 1923

86. *P. nawadus* Khan, Prasad & Mathur, 1967
87. *P. neoamblycephalus* Geraert, 1965
88. *P. neonanus* Mathur, Khan & Prasad, 1967
89. *P. neoprojectus* Wu & Hawn, 1975
90. *P. obtusicaudatus* Raski, 1975
91. *P. oostenbrinki* Misra & Edward, 1971
92. *P. pandatus* (Raski, 1976) Siddiqi, 1986
93. *P. pandus* Pinochet & Raski, 1977
94. *P. paralatescens* Maria, Cai, Ye & Powers, 2018
95. *P. paramonovi* Bagaturia & Solov'eva, in Solov'eva, 1975
96. *P. paraperaticus* Kashi, Karegar & Kheiri, 2009
97. *P. parastraeleni* Clavero-Camacho et al., 2021
98. *P. parvulus* (Raski, 1976) Siddiqi, 1986
99. *P. pedrami* Clavero-Camacho et al., 2021
100. *P. peperpotti* (Schoemaker, 1963) Siddiqi & Goodey, 1964
101. *P. peraticus* (Raski, 1962) Siddiqi & Goodey, 1964
102. *P. perlatus* Raski, 1975
103. *P. perminimus* Siddiqi, 1996
104. *P. pernoxius* Siddiqi, Baujard & Mounport, 1993
105. *P. pesticus* Thorne & Malek, 1968
106. *P. projectus* Jenkins, 1956
107. *P. prunii* Sharma, Sharma & Khan, 1986
108. *P. pseuduncinatus* Phukan & Sanwal, 1979
109. *P. raskii* (Phukan & Sanwal, 1979) Siddiqi, 1986
110. *P. recisus* Siddiqi, 1996
111. *P. robustus* Wu, 1974
112. *P. rostrocaudatus* Huang & Raski, 1987
113. *P. rotundicephalus* Bajaj, 1988
114. *P. salubris* Raski, 1975
115. *P. sarissus* Tarjan, 1960
116. *P. serricaudatus* Raski, 1975
117. *P. shenzhenensis* Wang, Xie, Li, Xu, Yu & Wang, 2013
118. *P. sheri* (Raski, 1973) Siddiqi, 1986
119. *P. similis* Khan, Prasad & Mathur, 1967
120. *P. sinensis* Maria, Miao, Castillo & Zheng, 2020
121. *P. solivagus* (Raski, 1976) Siddiqi, 1986
122. *P. steineri* Golden, 1961
123. *P. straeleni* (De Coninck, 1931) Oostenbrink, 1960
124. *P. tateae* Wu and Townshend, 1974
125. *P. tenuicaudatus* Wu, 1961
126. *P. teres* (Raski, 1976) Siddiqi, 1986
127. *P. thysanolus* Pramodini & Mohilal, 2009
128. *P. triincisus* Bajaj, 1988
129. *P. tui* Orton Williams, 1985

130. *P. uncinatus* Samibaeva, 1966
  131. *P. vandenbrandei* de Grisse, 1962
  132. *P. variabilis* Raski, 1975
  133. *P. variatus* Jairajpuri, 1982
  134. *P. veruculatus* Wu, 1962
  135. *P. verus* (Brzeski, 1995) Brzeski, 1998
  136. *P. vexans* Thorne & Malek, 1968
  137. *P. vitecus* (Pramodini, Mohalil & Dhanachand, 2006) Ghaderi et al., 2014
  138. *P. wuae* Yu, Ye & Powers, 2016
  139. *P. yokooi* (Toida, Ohshima & Hirata, 1983) Brzeski, 1998
  140. *P. zurgenerus* Clavero-Camacho et al., 2021
-





**Table S4:** Matrix codes for *Paratylenchus aquaticus* close related species, including: *P. aquaticus*, *P. humilis*, *P. pandus*, *P. triincisus*, *P. variatus*.

| <b>Paratylenchus species</b> | <b>A</b> | <b>B</b> | <b>C</b> | <b>D</b> | <b>E</b> | <b>F</b> | <b>G</b> | <b>H</b> | <b>I</b> | <b>J</b> | <b>K</b> | <b>L</b> | <b>M</b> | <b>N</b> | <b>O</b> | <b>P</b> | <b>Q</b> | <b>R</b> | <b>S</b> | <b>T</b> | <b>U</b> | <b>V</b> | <b>W</b> | <b>X</b> |
|------------------------------|----------|----------|----------|----------|----------|----------|----------|----------|----------|----------|----------|----------|----------|----------|----------|----------|----------|----------|----------|----------|----------|----------|----------|----------|
| <i>aquaticus_T</i>           | 1        | 2        | 2        | 1        | 2        | 2        | 2        | 2        | 1        | 2        | 1        | 2        | 4        | 324      | 32       | 4        | 2        | 23       | 1        | 1        | 23       | 1        | 1        | 2        |
| <i>humilis_T</i>             | 1        | 1        | 2        | 1        | 4        | 1        | 1        | 1        | 1        | 2        | 1        | 2        | 1        | 2        | 1        | 1        | 1        | 32       | 1        | 1        | 23       | 1        | 1        | 1        |
| <i>pandus_T</i>              | 21       | 3        | 2        | 1        | 2        | 1        | 2        | 1        | 1        | 1        | 4        | 1        | 3        | 324      | 23       | 3        | 2        | 21       | 1        | 3        | 21       | 1        | 1        | 21       |
| <i>triincisus_T</i>          | 1        | 3        | 2        | 1        | 2        | 2        | 2        | 1        | 1        | 2        | 1        | 2        | 3245     | 34       | 23       | 3        | 2        | 2        | 2        | 1        | 12       | 1        | 1        | 12       |
| <i>variatus_T</i>            | 1        | 3        | 2        | 1        | 2        | 2        | 1        | 1        | 1        | 1        | 4        | 1        | 31245    | 324      | 213      | 3        | 2        | 2        | 1        | 3        | 21       | 1        | 1        | 12       |
